# Supplementary material for: Visible light-catalytic dehydrogenation of benzylic alcohols to carbonyl compounds by using an eosin Y and nickel–thiolate complex dual catalyst system
Source: Royal Society of Chemistry journal article supplement (doi:10.1039/c8gc03828g), 2019-01-01
Supplement: c8gc03828g1.pdf [file c8gc03828g1.pdf]

*Supporting Information*

**Visible Light-catalytic Dehydrogenation of Benzylic  
Alcohols to Carbonyl Compounds by Using Eosin Y and  
Nickel-Thiolate Complex Dual Catalyst System**

Xiu-Jie Yang,<sup>\*a,b,c</sup> Yi-Wen Zheng,<sup>a,c</sup> Li-Qiang Zheng,<sup>c</sup> Li-Zhu Wu,<sup>a,d</sup> Chen-Ho  
Tung<sup>a,c,d</sup> and Bin Chen<sup>\*a,d</sup>

<sup>a</sup> Key Laboratory of Photochemical Conversion and Optoelectronic Materials, Technical Institute of  
Physics and Chemistry, the Chinese Academy of Sciences, Beijing 100190, China

<sup>b</sup> State Key Laboratory of Heavy Oil Processing, School of Chemical Engineering, China University of  
Petroleum, Qingdao, Shandong 266555, China

<sup>c</sup> Key Laboratory of Colloid and Interface Chemistry of Ministry of Education, Shandong University  
Jinan, Shandong 250100, China

<sup>d</sup> School of Future Technology, University of Chinese Academy of Sciences, Beijing, 100049, China

## 1. Materials

Eosin Y, Ni(OAc)<sub>2</sub>, 3-mercaptopropionic acid, benzyl alcohol, 4-methylbenzyl alcohol, 4-methoxybenzyl alcohol, 4-isopropylbenzyl alcohol, 4-chlorobenzyl alcohol, 4-bromobenzyl alcohol, 4-hydroxybenzyl alcohol, 1-(4-methoxyphenyl)ethanol, 1-phenyl-1-propanol, benzhydrol, 4-phenyl-2-butanol, 3-phenyl-1-propanol, 1-phenyl-1,3-butanedione were purchased from Acros, TCI or Sigma-Aldrich. Other chemicals are of analytical grade without further purification unless otherwise noted. The ultrapure water with 18.2 MΩ cm (Mettler Toledo, FE20, China) was used throughout the experiment.

## 2. General procedure for photocatalytic dehydrogenation of benzylic alcohols reaction

A 10 mL Pyrex tube equipped with a rubber septum and magnetic stir bar was charged with 5 mL aqueous solution of 0.2 mmol substrate, Ni-MPA catalyst (0.015 mmol Ni(OAc)<sub>2</sub> and 0.15 mmol 3-mercaptopropionic acid) and eosin Y (0.002 mmol), then adjusted the pH to 8.50. The Pyrex tube was sealed and the mixture was bubbled with argon gas for 20 min. Then, 500 μL CH<sub>4</sub> was injected to the Pyrex tube as the internal standard. The mixture was then irradiated with a green LED light ( $\lambda = 525$  nm) for 24 h at room temperature. After irradiation, gas composition is analyzed by gas chromatography (14B, Shimadzu) using thermal conductivity detector (TCD) with a 5 Å molecular sieve column and argon as the carrier gas. The solution was extracted with EtOAc (50 mL×3), washed with brine (50 mL×3), dried over Na<sub>2</sub>SO<sub>4</sub>. The products obtained after concentrated in vacuo were identified by <sup>1</sup>H NMR.

### 3. Detection of hydrogen

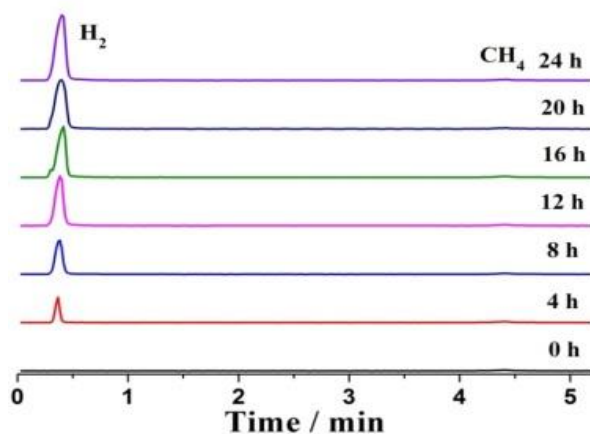

**Fig. S1** GC/TCD chromatograph of  $H_2$  production over time. Condition: LED (green light, 525 nm); room temperature; benzyl alcohol (0.2 mmol); Ni-MPA (7.5 mol%); eosin Y (1 mol%);  $H_2O$  (5 mL).

### 4. Mechanism study

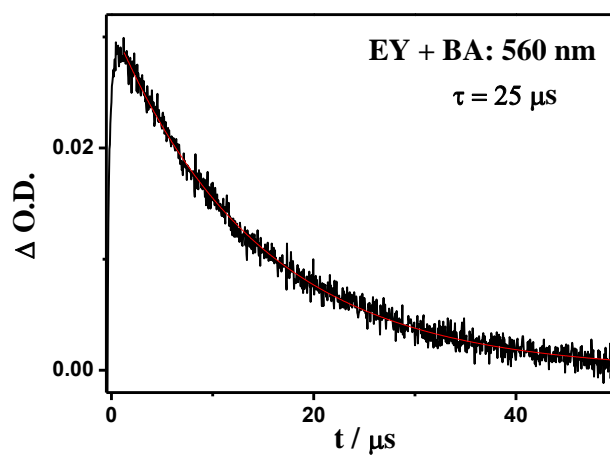

**Fig. S2** Kinetic trace at 560 nm when adding benzyl alcohol (BA,  $1 \times 10^{-3}$  M) to eosin Y ( $1 \times 10^{-5}$  M) with 532 nm light in de-aerated  $H_2O$ - $CH_3CN$  (3:2).

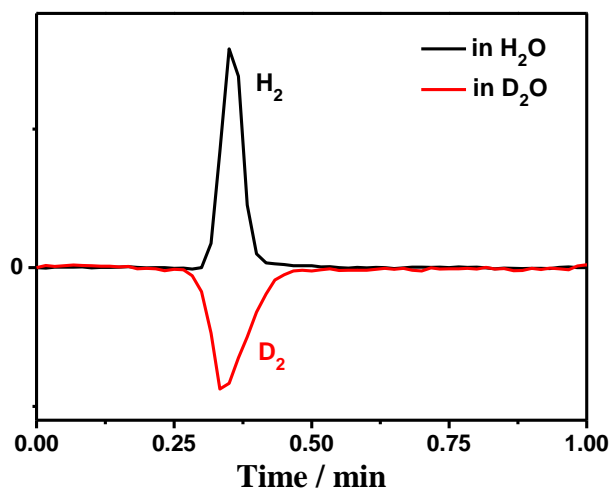

**Fig. S3** GC/TCD chromatograph of  $\text{H}_2$  production over time monitored by GC-TCD using He as carrier gas. Condition: LED (green light, 525 nm); room temperature; benzyl alcohol (0.2 mmol); Ni-MPA (7.5 mol%); EY (1 mol%); 5 mL  $\text{H}_2\text{O}$  or  $\text{D}_2\text{O}$ .

## 5. Large scale reaction of benzylic alcohol

Benzylic alcohol (2 mmol) was first dissolved in 1 mL  $\text{CH}_3\text{CN}$  solvent in a 100 mL reactor, followed by add 40 mL aqueous solution of Ni-MPA catalyst (0.15 mmol  $\text{Ni}(\text{OAc})_2$  and 1.5 mmol 3-mercaptopropionic acid) and eosin Y (0.02 mmol), then adjusted the pH to 8.50. The reactor was sealed and the mixture was bubbled with argon gas for 20 min. The reactor was then irradiated with a 300 W xenon equipped with a filter ( $\lambda > 400$  nm) for 27 h. The solution was extracted with EtOAc (50 mL $\times$ 3), washed with brine (50 mL $\times$ 3), and then dried over  $\text{Na}_2\text{SO}_4$ . Solvent was removed by rotary evaporation. The product was purified by flash chromatography with petroleum/EtOAc (10:1) and the isolated yield is 72%.
